# Supplementary material for: The molecular network governing nodule organogenesis and infection in the model legume Lotus japonicus
Source: PubMed Central journal article supplement — Nat Commun. 2010 Apr 12;1(1):1–12. doi: 10.1038/ncomms1009 (PMC2892300; doi:10.1038/ncomms1009), 2010-04-12
Supplement: ncomms1009-s1.pdf [file ncomms1009-s1.pdf]

**Supplementary Figure S1** Selected examples of nodulation with *M. loti* in plate experiments

**Supplementary Table S1** Complete data set for *ccamk-13snf2* and *hit1snf1* experiments

**Supplementary Table S2** *M. loti* strains used in this work

**Supplementary Table S3** Primers for detection of *M. loti nodA* and *nodC* mutants

**Supplementary Table S4** Genotyping of *Lotus* mutants

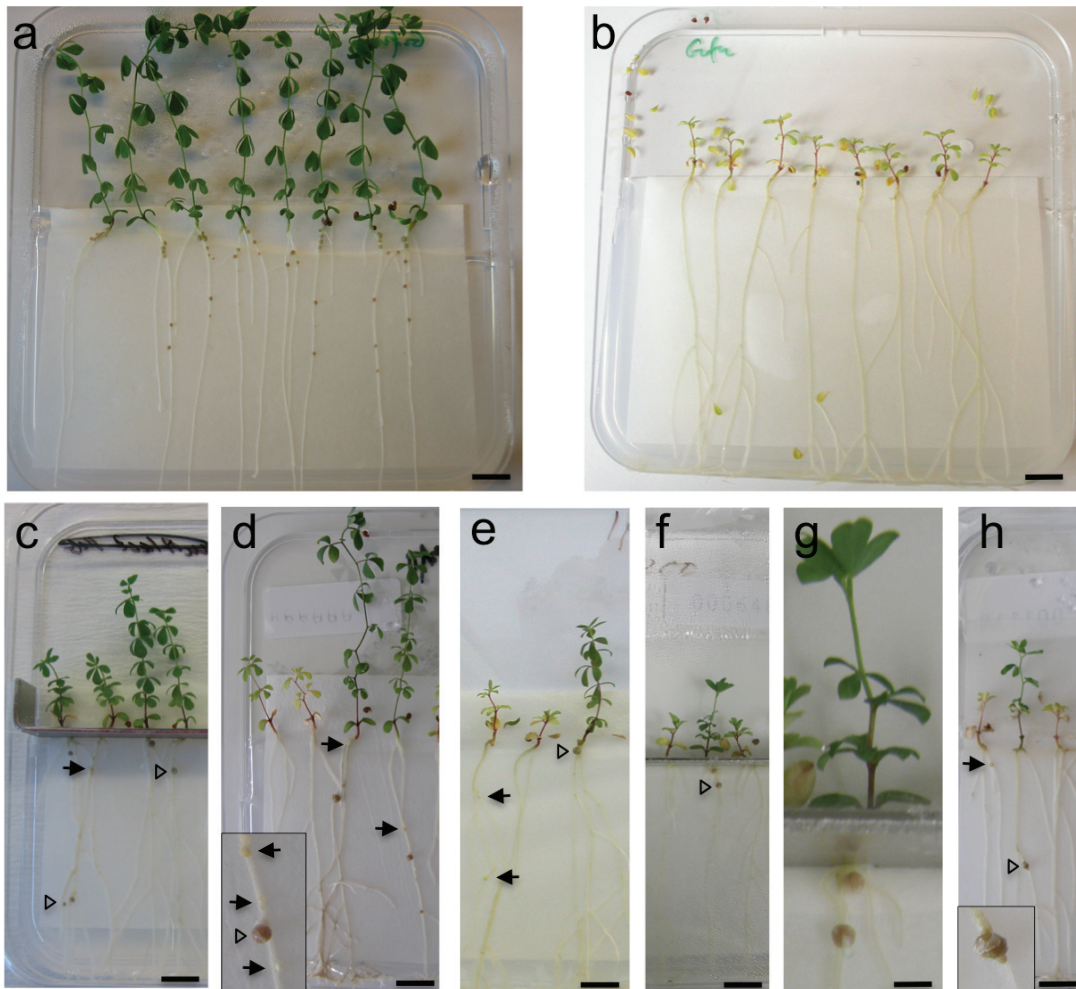

### Supplementary Figure S1

Selected examples of nodulation with *M. loti* in plate experiments

(a) *L. japonicus* wild type

(b) *L. japonicus* wild type, un-inoculated

(c) *symrk-3 snf1*

(d) *nup133-3 snf1* inset: close-up of spontaneous (white) and infected red nodule

(e) *nfr5-2 snf1*

(f) *nfr1-1 nfr5-2 snf1*

(g) close-up of plant with infected nodules in ( e)

(h) *nfr1-1 nfr5-2 symrk-3 snf1*. Inset: close-up of infected nodule

Arrows: examples of white, spontaneous nodules,

open triangles: examples of infected nodule

Size bars: (a- f) and ( h): 1 cm, (g): 0.25 cm

Supplementary Table S1.

| Plant genotype           | <i>M. loti</i> genotype | white nodules | red nodules | total nodules | % red nodules | nodules/plant | red nodules/plant | # plants |
|--------------------------|-------------------------|---------------|-------------|---------------|---------------|---------------|-------------------|----------|
| <i>ccamk-13snf2</i>      | no bacteria             | 86            | 0           | 86            | 0             | 0.9           | 0                 | 98       |
| <i>ccamk-13snf2</i>      | wild type               | 145           | 0           | 145           | 0             | 0.6           | 0                 | 249      |
| <i>hit1-1snf1</i>        | no bacteria             | 0             | 0           | 0             | 0             | 0             | 0                 | 103      |
| <i>hit1-1snf1</i>        | wild type               | 30            | 153         | 183           | 83.6          | 1.4           | 1.2               | 131      |
| <i>ccamk-13</i>          | wild type               | 0             | 0           | 0             | 0             | 0             | 0                 | 50       |
| <i>hit1</i>              | no bacteria             | 0             | 0           | 0             | 0             | 0             | 0                 | 29       |
| <i>hit1</i>              | wild type               | 8             | 40          | 48            | 83.3          | 1.1           | 0.9               | 43       |
| <i>snf1</i>              | no bacteria             | 34            | 0           | 34            | 0             | 3.4           | 0                 | 10       |
| <i>snf1</i>              | wild type               | 110           | 293         | 403           | 72.7          | 2.9           | 2.1               | 138      |
| <i>snf2</i>              | no bact                 | 46            | 0           | 46            | 0.0           | 0.8           | 0.0               | 60       |
| <i>snf2</i>              | wild type               | 357           | 64          | 421           | 15.2          | 3.5           | 0.5               | 120      |
| <i>L. japonicus</i> Gifu | no bacteria             | 0             | 0           | 0             | 0             | 0             | 0                 | 40       |
| <i>L. japonicus</i> Gifu | wild type               | 89            | 304         | 393           | 77.4          | 4.2           | 3.3               | 93       |

Complete data set for *ccamk-13snf2* and *hit1snf1* experiments

The epistatic relation between the *Lotus japonicus* calcium calmodulin dependent kinase gene, *CCaMK*, and the cytokinin receptor gene, *Lhk1*, was investigated in double mutants. Gain of function *snf1* (*CCaMK*) and *snf2* (*Lhk1*) alleles were combined with the loss of function *ccamk-13* and *hit1* (*Lhk1*) alleles, respectively and nodulation was scored in the absence or presence of *M. loti* bacteria. Formation of spontaneous nodules in uninoculated *ccamk-13snf2* double mutants and lack of spontaneous nodule development in uninoculated *hit1-1snf1* double mutants show that cytokinin signaling via the LHK1 receptor is operating downstream of the calcium calmodulin dependent kinase. As previously observed (Murray et al. 2007) the *hit1-1* mutants has reduced nodulation after inoculation and here we report a comparable reduction of nodulation in *hit1-1snf1* double mutants confirming the above interpretation of the epistatic relation between *CCaMK* and *Lhk1*. Under the conditions and time schedule used here inoculation enhances nodule organogenesis (mainly as white nodules) in the *snf2* mutants. A comparable enhancement was not observed in the inoculated *ccamk-13snf2* double mutants. Taken together this suggests that the effect of a relatively weak *snf2* gain of function allele is enhanced by activation of an upstream CCaMK protein following inoculation.

Supplementary Table S2. *M. loti* strains used in this work

| <i>M. loti</i> strain | Promoter/Visible marker |  | Reference                          |
|-----------------------|-------------------------|--|------------------------------------|
| R7A                   |                         |  | Sullivan et al. 1995               |
| R7A lacZ              | <i>IntS/lacZ</i>        |  | Sullivan et al. 1995 and this work |
| R7A gfp               | <i>Tn5-nptIII/eGFP</i>  |  | Sullivan et al. 1995 and this work |
| R7A nodA              |                         |  | Rodpothong et al. 2009             |
| R7A nodA              | <i>IntS/lacZ</i>        |  | Rodpothong et al. 2009             |
| R7A nodA              | <i>Tn5-nptIII/eGFP</i>  |  | Rodpothong et al. 2009             |
| R7A nodC              |                         |  | Rodpothong et al. 2009             |
| R7A nodC              | <i>IntS/lacZ</i>        |  | Rodpothong et al. 2009             |
| R7A nodC              | <i>Tn5-nptIII/eGFP</i>  |  | Rodpothong et al. 2009             |
| NZP2235               |                         |  | Jarvis et al 1982                  |
| NZP2235               | <i>hem-A/lacZ</i>       |  | Schauser et al. 1999               |
| NZP2235               | <i>lac/eGFP</i>         |  | Stuurmann et al. 2000              |

Supplementary Table S3 Primers for detection of *M. loti nodA* and *nodC* mutants

| Bacterial locus       | Forward primer          | Reverse primer            | Product size                        |
|-----------------------|-------------------------|---------------------------|-------------------------------------|
| <i>nodA</i>           | 5' AAGCGAGCGGATACCAGATC | 5' AGGTTGTGTCCACCGACAGCT  | Mutant: 523 bp<br>Wild type: 861 bp |
| <i>nodC</i> mutant    | 5' CGTTCAGGACGCTACTT    | 5' TACTGTTGCCATCTGCTCT    | ~1088 bp                            |
| <i>NodC</i> wild type | 5' TACTGTTGCCATCTGCTCTT | 5' GGTC AAGATTGT CGAATTGC | 1678 bp                             |

R7A *nodA* carries an in-frame deletion, R7A *nodC* is a Tn55 insertion.

Supplementary Table S4 Genotyping of *Lotus* mutants

| Genotype/detection method                                                                            | Type of mutation                                | fw primer seq                                          | rev primer seq                                             | temp         | length        | enzyme, if any | cut length mutant | cut length wt | recommended primer for sequencing |
|------------------------------------------------------------------------------------------------------|-------------------------------------------------|--------------------------------------------------------|------------------------------------------------------------|--------------|---------------|----------------|-------------------|---------------|-----------------------------------|
| <i>hnr1-1</i> CAPS or sequencing                                                                     | SNP_Q493 stop                                   | GGGTGGTTTACCCATAAAGCGTGTTC                             | GGGCAATGCAATTTGTGTGAG                                      | 51°C         | 341           | MseI           | 228+113           | 341           | reverse                           |
| <i>nrf5-2</i><br>wild type fragment, absent in <i>nrf5-2</i><br>mutant fragment, absent in wild type | LORE-2 insertion                                | CGACGTAGGTGATACGTACG<br>GTGACACAGTTGCCAGAGG            | CGAAGAATGATGCTGCTTT<br>GCTCTATCTGCCAAAGTCTAGGCC            | 54°C<br>54   | 391<br>235    |                |                   |               |                                   |
| <i>snr1-1</i> dCAPS or sequencing                                                                    | SNP_T265I<br>7 bp insertion, early stop         | CGCCCATAMAGGTTTGTGTTGGG<br>ACATTTCCAAATTTTCAAAACACTGTG | AAAAAAAAAAAAACCCACTGATATAGCTCGA<br>GACTAATGCCACCTAATATAGAG | 56°C<br>52°C | 255<br>~1000  | HinfI          | 255               | 220           | forward                           |
| <i>snr2</i> dCAPS                                                                                    | SNP_L286F                                       | CACCAAAATTTGCTTGTTACCGCAAAAGTTGACCGA                   | CCCTTCATGTGGCCCTTACCCAAC                                   | 60°C         | 255           | XmnI           | 220               | 255           | reverse                           |
| <i>hnr1-1</i> sequencing                                                                             |                                                 | GGGAGCCAAATATGAAGAGGGTG                                | TCAAGCTGCTTCTGGTTTGAAC                                     | 50           | 355           |                |                   |               | reverse                           |
| <i>nup133-3</i><br>wt fragment, absent in mutant<br>mutant fragment, absent in wild type             | LORE-1 insertion                                | TTTGGCTTGTCTGAAGGATGTGG<br>TTTGAATTAICAGGACATTCGCTTG   | TTGAAGATCTGAACCTTACTGTA<br>GACGAATCGAACCTCTGAAACC          | 54°C<br>54°C |               |                |                   |               |                                   |
| <i>nup85-1</i> sequencing                                                                            | SNP_W306 to stop                                | CTGCTGTAGAAAATCTTGGAAATGCG                             | CTTACTGTTGTGAATGCCCTGATGTAC                                | 56°C         | 359           |                |                   |               | forward                           |
| <i>hnr1-3</i> size difference                                                                        | 18 bp deletion, 6 amino acid deletion           | CCGTGAATGCGCTATTCGTTGAG-                               | CACAGCTTCTTCTGCATGGG                                       | 60°C         | wt563/m1545   |                |                   |               |                                   |
| <i>nhr2</i><br>wt fragment, absent in mutant<br>mutant fragment, absent in wt                        | transposon footprint 8 bp insertion, frameshift | AGCCATGGACAAATGAGTTGAGC<br>CGACCATGGACAAATGAGTTGACTAG  | CAAGGAATTTGGTACAGCCCTTC<br>CAAGGAATTTGGTACAGCCCTTC         | 62°C<br>62°C | 257<br>259    |                |                   |               |                                   |
| <i>symk-3</i><br>wt fragment, absent in <i>symk-2</i><br>mutant fragment, absent in wt               | LORE-2 insertion                                | CGGCATATAGAGCCCTGGAGAGTTG<br>GGAGGCTCTGATACCAATGTTAGG  | ACGCCCTTATGAAAATGTGG<br>CGGCAATAGAGCGGCTGGAGAGTTG          | 54°C<br>56°C | 251<br>ca.400 |                |                   |               |                                   |
| <i>symk-1</i><br>wt fragment, absent in <i>symk-2</i><br>mutant fragment, absent in wt               | LORE-1 insertion                                | CCATCTGTAAATGCTACTGCAC<br>AACGATTAATGATGCTAGGAC        | AACGATTAATGATGCTAGGAC<br>CACGAATCGAACCTGTGAAACC            | 52°C<br>52°C | 557           |                |                   |               |                                   |
| <i>pic1-1</i> size difference                                                                        | 414 bp deletion                                 | GATATGATGAAATGTGAAAAGTTTGACC                           | TTTAAAAAAGTTCTAGGTCAGGCACTC                                | 56°C         | 817wt/257mt   |                |                   |               |                                   |
| <i>nup-1</i><br>wt fragment, absent in <i>nup1-1</i><br>mutant fragment, absent in wild type         | LORE-1 insertion                                | CATGGCAATCTAGGAAGCTCTAC<br>CATGGCAATCTAGGAAGCTCTAC     | TTGGTCAATACTGCACAAATTCATAG<br>CACGAATCGAACTGTGAAACC        | 54°C<br>54°C |               |                |                   |               |                                   |
| <i>cerberus-3</i><br>wt fragment, absent in <i>cerberus-3</i><br>mutant fragment, absent in wt       | LORE-2 insertion                                | GGCTTTGAGATGTTGATCGTTGATC<br>CAGCTTAGGACAAAGCTTAGTTC   | GGACAAATCAGCAGAGTCAAGGTATC<br>GGACAAATCAGCAGAGTCAAGGTATC   | 55°C<br>55°C |               |                |                   |               |                                   |
| <i>cyclops-2</i> sequencing                                                                          | 1 bp deletion, frameshift                       | CTCATGTTGATCTAACCTGAACAC                               | CTTGACCAATAGAGTCTACTTGAAC                                  | 54°C         | 250           |                |                   |               | reverse                           |
| <i>gastor-1</i> sequencing                                                                           | 6 bp deletion, 2 amino acid deletion            | GACTGGAGTCAAAAGAAGATTAGGAG                             | CTGTCTTGTCTAATAATTAATGTAAGCTG                              | 54°C         | 287           |                |                   |               | forward                           |
| <i>nsp1-1</i> sequencing                                                                             | SNP_W520 to stop                                | GCACCTGACAAACCAGCGGGGAGATG                             | CTCATGTTGGCACATGTAACCTTCTGTAC                              | 56°C         | 309           |                |                   |               | forward                           |
| <i>nsp2-3</i> sequencing                                                                             | SNP_Q244 to stop                                | CCACGAACCCCAAAATGATGCTCT                               | CAAGTCTGGAGTGTGGAAATGAGAAAGG                               | 56°C         | 343           |                |                   |               | forward                           |

## References;

Jarvis et al. 1982: International Journal of Systematic Bacteriology 32, 378-380

Murray JD, Karas BJ, Sato S, Tabata, S, Amyot L, et al (2007) a cytokin perception mutant colonized by *Rhizobium* in the absence of nodule organogenesis. Science 5808: 101-104

Rodpothong P, Sullivan JT, Songsrirote K, Sumpton D, Cheung K. WJ-T, et al (2009) Nodulation Gene Mutants of *Mesorhizobium loti* R7A – *nodZ* and *nolL* Mutants Have Host-Specific Phenotypes on *Lotus* Species. MPMI 22, 1546-1554

Schauser L, Roussis A, Stiller J, Stougaard J (1999). A plant regulator controlling development of symbiotic root nodules. Nature 402:191-195.

Stuurman N, Pacios Bras C, Schlaman HRM, Wijfjes AHM, Bloemberg G, et al (2000). Use of Green Fluorescent Protein Color Variants Expressed on Stable Broad-Host-Range Vectors to Visualize Rhizobia Interacting with Plants MPMI 13, 1163-1169.

Sullivan JT, Patrick HN, Lowther WL, Scott DB, Ronson CW.(1995) Nodulating strains of *Rhizobium loti* arise through chromosomal symbiotic gene transfer in the environment. Proc Natl Acad Sci U S A. 92:8985-8989.
